# Supplementary material for: Dietary Supplementation with Nucleotides, Short-Chain Fructooligosaccharides, Xylooligosaccharides, Beta-Carotene and Vitamin E Influences Immune Function in Kittens
Source: MDPI journal article supplement (doi:10.3390/ani13233734), 2023-12-02
Supplement: s1 [file s1]

## Supplementary Material

### Dietary Supplementation with Nucleotides, Short-Chain Fructooligosaccharides, Xylooligosaccharides, Beta-Carotene and Vitamin E Influences Immune Function in Kittens

**Supplementary Table S1: Sample collection volumes and blood tubes**

Details of total blood collection volumes, measures and blood tubes per timepoint.

| Week      | Total blood at timepoint (ml) | Measures                                                 | Volume required for measure (ml) | Blood tube                                            |
|-----------|-------------------------------|----------------------------------------------------------|----------------------------------|-------------------------------------------------------|
| 10        | 3                             | Serum titres, biochemistry and immunoglobulin            | 2.2                              | 2 x 1.1ml gel-activated serum clot                    |
|           |                               | Haematology                                              | 0.2                              | 200µl K3-EDTA Microvette                              |
|           |                               | Nucleotides                                              | 0.6                              | 500µl K3-EDTA Microvette and 200µl K3-EDTA Microvette |
| 12        | 4                             | Serum titres, biochemistry, immunoglobulin and cytokines | 2.7                              | 3ml gel-activated serum clot                          |
|           |                               | Proliferation and phagocytosis                           | 1.2                              | 1.3ml Lithium Heparin tube                            |
| 14 and 23 | 3                             | Serum titres, biochemistry, immunoglobulin and cytokines | 2.7                              | 3ml gel-activated serum clot tube                     |
|           |                               | Haematology                                              | 0.2                              | 200µl K3-EDTA Microvette                              |
| 18 and 27 | 4.7                           | Serum titres, biochemistry and immunoglobulin            | 2.2                              | 2 x 1.1ml gel-activated serum clot                    |
|           |                               | Haematology                                              | 0.2                              | 200µl K3-EDTA Microvette tube                         |
|           |                               | Nucleotides                                              | 0.6                              | 500µl K3-EDTA Microvette and 200µl K3-EDTA Microvette |
|           |                               | Phenotyping                                              | 0.5                              | 500µl K3-EDTA Microvette                              |
|           |                               | Proliferation and phagocytosis                           | 1.2                              | 1.3ml Lithium Heparin                                 |

#### Blood tubes

1.1ml gel-activated serum clot tubes (Sarstedt 41.1378.005)

200µl K3-EDTA Microvette tube (Sarstedt 20.1288)

500µl K3-EDTA Microvette 500 (Sarstedt 20.1341)

3ml gel-activated serum clot tube (Greiner Bio One, 454095)

1.3ml Lithium Heparin tube (Sarstedt, 41.1393.005)

## Supplementary Table S2: Haematology parameters

Haematology values given as means and 95% confidence intervals (CI) for control and test kitten diet group. P values represents comparison between diet group at the sample collection timepoint, values in bold are statistically significant ( $p < 0.05$ ).

| Parameter                                         | Weeks | Control |        |              | Test |        |              | P     |
|---------------------------------------------------|-------|---------|--------|--------------|------|--------|--------------|-------|
|                                                   |       | n       | Mean   | 95% CI       | n    | Mean   | 95% CI       |       |
| Red blood cells ( $10^{12}/L$ )                   | 10    | 15      | 7.649  | 7.200, 8.098 | 8    | 7.370  | 6.813, 7.926 | 0.430 |
|                                                   | 14    | 12      | 7.382  | 6.909, 7.856 | 14   | 7.866  | 7.366, 8.367 | 0.159 |
|                                                   | 18    | 13      | 7.400  | 6.939, 7.862 | 11   | 7.614  | 7.088, 8.141 | 0.534 |
|                                                   | 23    | 11      | 8.135  | 7.654, 8.615 | 15   | 8.917* | 8.422, 9.413 | 0.028 |
|                                                   | 27    | 19      | 8.528* | 8.107, 8.950 | 15   | 8.548* | 8.054, 9.042 | 0.950 |
| Haemoglobin (g/dL)                                | 10    | 15      | 10.59  | 9.90, 11.29  | 8    | 11.09  | 10.24, 11.93 | 0.361 |
|                                                   | 14    | 12      | 10.11  | 9.39, 10.83  | 14   | 11.33  | 10.55, 12.12 | 0.027 |
|                                                   | 18    | 13      | 10.36  | 9.65, 11.07  | 11   | 11.36  | 10.54, 12.17 | 0.068 |
|                                                   | 23    | 11      | 11.51* | 10.78, 12.24 | 15   | 12.31* | 11.53, 13.10 | 0.130 |
|                                                   | 27    | 19      | 11.96* | 11.30, 12.62 | 15   | 12.57* | 11.79, 13.35 | 0.223 |
| Hematocrit (l/L)                                  | 10    | 15      | 34.92  | 32.47, 37.38 | 8    | 36.77  | 33.79, 39.74 | 0.328 |
|                                                   | 14    | 12      | 33.40  | 30.87, 35.93 | 14   | 37.40  | 34.59, 40.21 | 0.039 |
|                                                   | 18    | 13      | 33.68  | 31.18, 36.17 | 11   | 36.65  | 33.77, 39.54 | 0.118 |
|                                                   | 23    | 11      | 36.57  | 34.02, 39.11 | 15   | 39.58* | 36.78, 42.38 | 0.111 |
|                                                   | 27    | 19      | 38.18* | 35.81, 40.56 | 15   | 40.49* | 37.69, 43.28 | 0.199 |
| Mean corpuscular volume (fL)                      | 10    | 15      | 45.82  | 43.18, 48.45 | 8    | 49.83  | 46.68, 52.98 | 0.054 |
|                                                   | 14    | 12      | 45.33  | 42.66, 48.01 | 14   | 47.66  | 44.59, 50.72 | 0.238 |
|                                                   | 18    | 13      | 45.57  | 42.91, 48.22 | 11   | 48.01  | 44.91, 51.11 | 0.220 |
|                                                   | 23    | 11      | 45.15  | 42.46, 47.83 | 15   | 44.60* | 41.54, 47.65 | 0.776 |
|                                                   | 27    | 19      | 44.90  | 42.31, 47.49 | 15   | 47.25* | 44.19, 50.30 | 0.225 |
| Mean corpuscular haemoglobin (pg)                 | 10    | 15      | 13.91  | 13.17, 14.65 | 8    | 15.03  | 14.14, 15.92 | 0.057 |
|                                                   | 14    | 12      | 13.73  | 12.97, 14.48 | 14   | 14.46  | 13.60, 15.31 | 0.192 |
|                                                   | 18    | 13      | 14.01  | 13.26, 14.76 | 11   | 14.91  | 14.04, 15.78 | 0.114 |
|                                                   | 23    | 11      | 14.22  | 13.45, 14.98 | 15   | 13.91* | 13.07, 14.76 | 0.579 |
|                                                   | 27    | 19      | 14.06  | 13.34, 14.78 | 15   | 14.68  | 13.83, 15.53 | 0.253 |
| Mean corpuscular haemoglobin concentration (g/dL) | 10    | 15      | 30.34  | 29.84, 30.83 | 8    | 30.22  | 29.61, 30.82 | 0.750 |
|                                                   | 14    | 12      | 30.27  | 29.76, 30.79 | 14   | 30.34  | 29.78, 30.90 | 0.853 |
|                                                   | 18    | 13      | 30.71  | 30.20, 31.22 | 11   | 31.09* | 30.51, 31.67 | 0.313 |
|                                                   | 23    | 11      | 31.52* | 31.00, 32.05 | 15   | 31.20* | 30.64, 31.76 | 0.384 |
|                                                   | 27    | 19      | 31.35* | 30.87, 31.82 | 15   | 31.10* | 30.54, 31.65 | 0.480 |
| Red blood cell distribution width (%)             | 10    | 15      | 24.02  | 22.91, 25.14 | 8    | 22.32  | 20.94, 23.71 | 0.060 |
|                                                   | 14    | 12      | 19.15* | 17.97, 20.33 | 14   | 18.62* | 17.38, 19.86 | 0.526 |
|                                                   | 18    | 13      | 16.98* | 15.83, 18.13 | 11   | 16.79* | 15.48, 18.10 | 0.822 |
|                                                   | 23    | 11      | 17.08* | 15.88, 18.28 | 15   | 18.38* | 17.15, 19.61 | 0.130 |
|                                                   | 27    | 19      | 16.64* | 15.59, 17.68 | 15   | 17.11* | 15.89, 18.33 | 0.545 |
| White blood cells ( $10^9/L$ )                    | 10    | 15      | 19.89  | 16.20, 23.58 | 8    | 12.97  | 8.50, 17.44  | 0.022 |
|                                                   | 14    | 12      | 15.16* | 11.36, 18.97 | 14   | 10.68  | 6.45, 14.90  | 0.114 |
|                                                   | 18    | 13      | 13.21* | 9.46, 16.96  | 11   | 10.12  | 5.78, 14.46  | 0.271 |
|                                                   | 23    | 11      | 13.98* | 10.15, 17.81 | 15   | 11.33  | 7.12, 15.53  | 0.337 |
|                                                   | 27    | 19      | 14.35* | 10.79, 17.92 | 15   | 10.25  | 6.05, 14.45  | 0.132 |
| Lymphocytes ( $10^9/L$ )                          | 10    | 15      | 10.050 | 8.107, 11.99 | 8    | 5.706  | 3.357, 8.055 | 0.008 |
|                                                   | 14    | 12      | 7.069* | 5.072, 9.067 | 14   | 4.846  | 2.616, 7.076 | 0.134 |
|                                                   | 18    | 13      | 6.975* | 5.004, 8.947 | 11   | 4.742  | 2.458, 7.025 | 0.136 |
|                                                   | 23    | 11      | 6.439* | 4.427, 8.451 | 15   | 4.447  | 2.227, 6.668 | 0.177 |

|                                               |    |    |         |                |    |        |                |       |
|-----------------------------------------------|----|----|---------|----------------|----|--------|----------------|-------|
|                                               | 27 | 19 | 7.300*  | 5.418, 9.182   | 15 | 5.244  | 3.024, 7.465   | 0.151 |
| Monocytes<br>(10 <sup>9</sup> /L)             | 10 | 15 | 0.6779  | 0.5076, 0.8483 | 8  | 0.3164 | 0.1114, 0.5215 | 0.011 |
|                                               | 14 | 12 | 0.4567* | 0.2824, 0.6309 | 14 | 0.2927 | 0.0962, 0.4893 | 0.202 |
|                                               | 18 | 13 | 0.4552* | 0.2829, 0.6276 | 11 | 0.2709 | 0.0705, 0.4713 | 0.158 |
|                                               | 23 | 11 | 0.4234* | 0.2481, 0.5987 | 15 | 0.2674 | 0.0716, 0.4633 | 0.224 |
|                                               | 27 | 19 | 0.4492* | 0.2832, 0.6151 | 15 | 0.2874 | 0.0916, 0.4833 | 0.196 |
| Total<br>granulocytes<br>(10 <sup>9</sup> /L) | 10 | 15 | 9.191   | 7.291, 11.090  | 8  | 6.955  | 4.627, 9.283   | 0.137 |
|                                               | 14 | 12 | 7.642   | 5.661, 9.623   | 14 | 5.528  | 3.383, 7.672   | 0.146 |
|                                               | 18 | 13 | 5.775*  | 3.833, 7.717   | 11 | 5.126  | 2.897, 7.354   | 0.652 |
|                                               | 23 | 11 | 7.141   | 5.138, 9.144   | 15 | 6.605  | 4.476, 8.735   | 0.705 |
|                                               | 27 | 19 | 6.615*  | 4.807, 8.424   | 15 | 4.772  | 2.642, 6.901   | 0.181 |
| Platelet<br>count<br>(10 <sup>9</sup> /L)     | 10 | 15 | 585.7   | 423.1, 810.9   | 8  | 542.7  | 360.3, 817.5   | 0.769 |
|                                               | 14 | 12 | 569.1   | 402.0, 805.7   | 14 | 510.1  | 356.6, 729.7   | 0.656 |
|                                               | 18 | 13 | 282.4*  | 201.6, 395.5   | 11 | 343.3  | 234.3, 503.0   | 0.440 |
|                                               | 23 | 11 | 503.7   | 353.7, 717.4   | 15 | 438.4  | 307.9, 624.4   | 0.574 |
|                                               | 27 | 19 | 331.0*  | 244.9, 447.4   | 15 | 357.8  | 251.6, 508.8   | 0.731 |
| Mean<br>platelet<br>volume (fL)               | 10 | 15 | 10.27   | 9.59, 10.95    | 8  | 9.51   | 8.69, 10.33    | 0.153 |
|                                               | 14 | 12 | 9.82    | 9.12, 10.52    | 14 | 9.28   | 8.50, 10.06    | 0.291 |
|                                               | 18 | 13 | 9.47*   | 8.78, 10.17    | 11 | 8.98   | 8.17, 9.78     | 0.334 |
|                                               | 23 | 11 | 9.40*   | 8.69, 10.10    | 15 | 9.06   | 8.28, 9.84     | 0.507 |
|                                               | 27 | 19 | 9.60*   | 8.94, 10.25    | 15 | 9.37   | 8.59, 10.15    | 0.639 |

\* A significant difference from week 10 within diet group ( $p < 0.05$ )

### Supplementary Table S3: Physical measurements

Physical measurement values given as means and 95% confidence intervals (CI) for control and test kitten diet group. P values represents comparison between diet group at the sample collection timepoint, values in bold are statistically significant ( $p < 0.05$ ).

| Parameter              | Weeks | Control |      |            |  | Test |      |            | <i>p</i> |
|------------------------|-------|---------|------|------------|--|------|------|------------|----------|
|                        |       | n       | Mean | 95% CI     |  | n    | Mean | 95% CI     |          |
| Height at withers (cm) | 27    | 20      | 26.8 | 25.8, 27.8 |  | 20   | 27.6 | 26.5, 28.7 | 0.263    |
| Thoracic girth (cm)    | 27    | 20      | 29.3 | 28.3, 30.3 |  | 20   | 30.9 | 30.2, 31.7 | 0.013    |
| Rump width (cm)        | 27    | 20      | 7.1  | 6.3, 8.0   |  | 20   | 6.9  | 5.9, 8.0   | 0.789    |

# Supplementary Table S4: Immune parameters

Immune parameter values given as means and 95% confidence intervals (CI) for control and test kitten diet group. P values represents comparison between diet group at the sample collection timepoint, values in bold are statistically significant ( $p < 0.05$ ).

| Parameter                                   | Weeks | Control |        |                |  | Test |         |                 | p     |
|---------------------------------------------|-------|---------|--------|----------------|--|------|---------|-----------------|-------|
|                                             |       | n       | Mean   | 95% CI         |  | n    | Mean    | 95% CI          |       |
| Phagocytosis (%)                            | 12    | 11      | 60.3   | 47.1, 73.5     |  | 12   | 55.6    | 41.4, 69.7      | 0.602 |
|                                             | 18    | 19      | 53.4   | 44.6, 62.1     |  | 14   | 59.9    | 48.8, 70.9      | 0.330 |
|                                             | 27    | 20      | 49.3   | 39.9, 58.7     |  | 14   | 61.8    | 50.4, 73.3      | 0.089 |
| Phenotyping: CD5+ cells (%)                 | 18    | 7       | 16.8   | 6.4, 27.1      |  | 6    | 25.3    | 12.7, 37.9      | 0.233 |
|                                             | 27    | 8       | 19.8   | 9.7, 29.9      |  | 7    | 29.0    | 17.6, 40.4      | 0.180 |
| Phenotyping: CD5+CD4+ cells (%)             | 18    | 7       | 10.6   | 3.3, 17.9      |  | 7    | 18.7    | 9.9, 27.6       | 0.130 |
|                                             | 27    | 8       | 12.7   | 5.6, 19.9      |  | 8    | 17.2    | 9.1, 25.3       | 0.327 |
| Phenotyping: CD21+ cells (%)                | 18    | 7       | 18.2   | 12.1, 24.3     |  | 6    | 22.4    | 15.3, 29.5      | 0.293 |
|                                             | 27    | 8       | 16.0   | 10.3, 21.7     |  | 7    | 24.8    | 18.2, 31.4      | 0.054 |
| Phenotyping: CD5+CD8+ cells (%)             | 18    | 7       | 3.3    | 1.7, 4.9       |  | 6    | 4.8     | 2.6, 7.0        | 0.209 |
|                                             | 27    | 8       | 8.1*   | 3.2, 13.1      |  | 7    | 8.7*    | 3.7, 13.6       | 0.843 |
| Phenotyping CD5+CD4+: CD5+CD8+              | 18    | 7       | 3.1    | 2.3, 3.9       |  | 6    | 3.6     | 2.6, 4.6        | 0.360 |
|                                             | 27    | 8       | 2.0*   | 1.1, 2.9       |  | 7    | 2.1*    | 1.1, 3.0        | 0.840 |
| Proliferation: SEB EC50 (cell count/ml)     | 12    | 12      | 200000 | 57966, 342063  |  | 12   | 24797   | -120990, 170585 | 0.089 |
|                                             | 18    | 14      | 191488 | 62913, 320062  |  | 9    | 288800* | 138885, 438715  | 0.320 |
|                                             | 27    | 9       | 226497 | 107841, 345153 |  | 5    | 157873  | 14775, 300970   | 0.454 |
| Proliferation: SEB EC80 (cell count/ml)     | 12    | 12      | 412700 | 223232, 602168 |  | 12   | 146152  | -46145, 338449  | 0.052 |
|                                             | 18    | 14      | 401116 | 230658, 571575 |  | 9    | 556351* | 358448, 754255  | 0.233 |
|                                             | 27    | 9       | 416167 | 259798, 572537 |  | 5    | 437285* | 248631, 625939  | 0.861 |
| Proliferation: Con A EC50 (cell count/ml)   | 12    | 12      | 227170 | 90218, 364121  |  | 12   | 133482  | -9993, 276958   | 0.340 |
|                                             | 18    | 14      | 257185 | 128212, 386158 |  | 9    | 170427  | 23168, 317685   | 0.368 |
|                                             | 27    | 9       | 229067 | 104743, 353392 |  | 5    | 175202  | 34188, 316215   | 0.559 |
| Proliferation: Con A EC80 (cell count/ml)   | 12    | 12      | 231692 | 61560, 401824  |  | 12   | 177846  | -4502, 360194   | 0.659 |
|                                             | 18    | 14      | 224400 | 68437, 380364  |  | 9    | 203404  | 16944, 389864   | 0.859 |
|                                             | 27    | 9       | 264307 | 114750, 413864 |  | 5    | 253435  | 73738, 433131   | 0.923 |
| Proliferation: PMA/ION EC50 (cell count/ml) | 12    | 12      | 146776 | -42815, 336367 |  | 12   | -1919   | -200086, 196249 | 0.276 |
|                                             | 18    | 14      | 117180 | -56251, 290611 |  | 9    | 64706   | -138686, 268097 | 0.689 |
|                                             | 27    | 9       | 279894 | 118199, 441588 |  | 5    | 117349  | -77418, 312116  | 0.197 |
| Proliferation: PMA/ION EC80 (cell count/ml) | 12    | 12      | 326615 | 127910, 525320 |  | 12   | 42890   | -151887, 237666 | 0.046 |
|                                             | 18    | 14      | 484610 | 308877, 660344 |  | 9    | 695310* | 494672, 895949  | 0.117 |
|                                             | 27    | 9       | 396862 | 238371, 555353 |  | 5    | 413366* | 222243, 604489  | 0.893 |

SEB, Staphylococcal Enterotoxin B; Con A, Concanavalin A; PMA/ION, Phorbol 12-myristate 13-acetate/Ionomycin

\* A significant difference from first timepoint within diet group ( $p < 0.05$ )

### Supplementary Table S5: Phenotyping

Immune parameter values given as medians and interquartile range (IQR) for control and test kitten diet group. P values represents comparison between diet group at the sample collection timepoint, values in bold are statistically significant ( $p < 0.05$ ).

| Parameter                       |       | Control |        |            |  | Test |        |            | <i>p</i> |
|---------------------------------|-------|---------|--------|------------|--|------|--------|------------|----------|
|                                 | Weeks | n       | Median | IQR        |  | n    | Median | IQR        |          |
| Phenotyping:<br>CD18+ cells (%) | 18    | 7       | 33.6   | 31.4, 36.7 |  | 6    | 41.7   | 36.6, 42.9 | 0.474    |
|                                 | 27    | 8       | 39.3   | 28.9, 46.3 |  | 7    | 44.3   | 26.6, 72.5 | 0.743    |

A significant difference from first timepoint within diet group ( $p < 0.05$ )

### Supplementary Table S6: Serum cytokines

Serum cytokine values given as means and 95% confidence intervals (CI) for control and test diet kitten group. P values represents comparison between diet group at the sample collection timepoint ( $p < 0.05$  is statistically significant).

| Parameter             | Control |    |        |              | Test |        |               | <i>p</i> |
|-----------------------|---------|----|--------|--------------|------|--------|---------------|----------|
|                       | Week    | n  | Mean   | 95% CI       | n    | Mean   | 95% CI        |          |
| Flt-3L (pg/ml)        | 12      | 9  | 33.07  | 22.29, 43.85 | 11   | 45.28  | 34.51, 56.06  | 0.103    |
|                       | 14      | 6  | 32.95  | 21.59, 44.30 | 12   | 24.04* | 13.33, 34.75  | 0.231    |
|                       | 23      | 9  | 34.73  | 23.98, 45.47 | 7    | 21.13* | 10.12, 32.15  | 0.077    |
| GM CSF (pg/ml)        | 12      | 2  | 16.96  | -4.61, 38.53 | 6    | 29.99  | 11.40, 48.59  | 0.259    |
|                       | 14      | 2  | 32.90* | 11.36, 54.45 | 1    | 28.59  | 9.95, 47.23   | 0.700    |
|                       | 23      | 1  | 15.67* | -5.59, 36.93 | 2    | 56.12* | 38.98, 73.26  | 0.010    |
| IFN- $\gamma$ (pg/ml) | 12      | 10 | 207.4  | 79.6, 335.2  | 8    | 165.9  | 16.7, 315.0   | 0.663    |
|                       | 14      | 7  | 266.4  | 122.6, 410.1 | 11   | 197.9  | 61.0, 334.8   | 0.478    |
|                       | 23      | 10 | 191.7  | 59.9, 323.4  | 10   | 93.2   | -45.2, 231.6  | 0.291    |
| IL-1 $\beta$ (pg/ml)  | 12      | 7  | 28.18  | 13.06, 43.29 | 9    | 51.92  | 36.17, 67.66  | 0.036    |
|                       | 14      | 4  | 33.46  | 15.87, 51.06 | 12   | 14.70* | -0.34, 29.73  | 0.100    |
|                       | 23      | 7  | 24.86  | 9.46, 40.25  | 8    | 15.75* | 0.27, 31.22   | 0.369    |
| IL-2 (pg/ml)          | 12      | 6  | 30.70  | 15.16, 62.15 | 10   | 67.21  | 30.91, 146.10 | 0.122    |
|                       | 14      | 5  | 41.47  | 20.06, 85.75 | 8    | 29.94* | 13.62, 65.83  | 0.506    |
|                       | 23      | 3  | 32.72  | 15.96, 67.09 | 7    | 23.10* | 10.54, 50.65  | 0.473    |
| PDGF-BB (pg/ml)       | 12      | 12 | 1850   | 982, 2718    | 15   | 2267   | 1255, 3279    | 0.506    |
|                       | 14      | 10 | 1944   | 1065, 2822   | 13   | 1740*  | 729, 2752     | 0.746    |
|                       | 23      | 11 | 1824   | 956, 2691    | 15   | 1703*  | 693, 2712     | 0.845    |
| IL-12 (pg/ml)         | 12      | 12 | 152.3  | 113.3, 191.4 | 15   | 202.9  | 158.8, 247.1  | 0.087    |
|                       | 14      | 12 | 145.9  | 105.5, 186.2 | 15   | 154.2* | 110.1, 198.2  | 0.771    |
|                       | 23      | 15 | 153.2  | 114.4, 191.9 | 15   | 138.2* | 94.4, 182.1   | 0.592    |
| IL-13 (pg/ml)         | 12      | 9  | 22.46  | 17.32, 29.11 | 11   | 28.60  | 21.39, 38.24  | 0.205    |
|                       | 14      | 9  | 23.49  | 18.05, 30.58 | 12   | 17.76* | 13.35, 23.61  | 0.145    |
|                       | 23      | 11 | 19.36  | 15.00, 24.99 | 13   | 20.41* | 15.26, 27.30  | 0.774    |
| IL-4 (pg/ml)          | 12      | 10 | 281.6  | 121.2, 654.2 | 12   | 173.4  | 66.1, 455.0   | 0.428    |
|                       | 14      | 12 | 207.2  | 87.7, 489.7  | 12   | 182.5  | 69.8, 476.8   | 0.834    |
|                       | 23      | 11 | 173.7  | 74.8, 403.4  | 13   | 165.8  | 63.3, 434.1   | 0.938    |
| IL-6 (pg/ml)          | 12      | 12 | 108.8  | 51.9, 228.0  | 10   | 84.2   | 35.8, 197.9   | 0.635    |
|                       | 14      | 12 | 86.2   | 39.9, 186.2  | 15   | 85.1   | 36.8, 196.6   | 0.980    |
|                       | 23      | 10 | 75.5   | 35.6, 159.8  | 10   | 81.8   | 35.1, 190.3   | 0.882    |
| IL-8 (pg/ml)          | 12      | 7  | 36.96  | 19.99, 53.93 | 7    | 54.09  | 35.13, 73.04  | 0.160    |
|                       | 14      | 6  | 36.33  | 19.09, 53.56 | 6    | 16.77* | -2.44, 35.98  | 0.122    |
|                       | 23      | 3  | 33.40  | 14.45, 52.35 | 3    | 25.25* | 2.61, 47.88   | 0.566    |
| KC (pg/ml)            | 12      | 1  | 20.85  | 2.87, 38.83  | 1    | 15.63  | -11.75, 43.01 | 0.746    |
|                       | 14      | 4  | 17.87  | 4.57, 31.18  | 3    | 19.69  | 8.13, 31.25   | 0.813    |
|                       | 23      | 6  | 32.54  | 21.77, 43.32 | 4    | 32.13  | 16.29, 47.98  | 0.948    |
| SDF 1 (pg/ml)         | 12      | 12 | 1079   | 767, 1391    | 14   | 1131   | 779, 1483     | 0.816    |
|                       | 14      | 12 | 1222   | 900, 1544    | 15   | 1093   | 742, 1444     | 0.571    |
|                       | 23      | 14 | 1159   | 850, 1469    | 15   | 1108   | 758, 1457     | 0.815    |
| RANTES (pg/ml)        | 12      | 7  | 24.58  | 16.87, 35.83 | 9    | 30.10  | 19.96, 45.40  | 0.442    |
|                       | 14      | 8  | 23.59  | 15.96, 34.86 | 8    | 15.29* | 10.01, 23.36  | 0.128    |
|                       | 23      | 9  | 21.38  | 14.51, 31.52 | 6    | 18.93* | 12.46, 28.75  | 0.651    |
| SCF (pg/ml)           | 12      | 12 | 60.13  | 40.21, 89.91 | 12   | 42.20  | 26.66, 66.80  | 0.236    |

|               |    |    |       |              |  |    |        |               |  |       |
|---------------|----|----|-------|--------------|--|----|--------|---------------|--|-------|
|               | 14 | 11 | 51.23 | 33.69, 77.92 |  | 13 | 42.11  | 26.58, 66.70  |  | 0.514 |
|               | 23 | 14 | 47.26 | 31.75, 70.34 |  | 13 | 35.70  | 22.71, 56.13  |  | 0.335 |
| TNF_a (pg/ml) | 12 | 12 | 138.4 | 18.1, 258.6  |  | 12 | 220.3  | 57.7, 383.0   |  | 0.306 |
|               | 14 | 14 | 192.7 | 70.8, 314.7  |  | 9  | 111.7  | -96.6, 320.0  |  | 0.408 |
|               | 23 | 9  | 54.7  | -69.6, 178.9 |  | 5  | 61.6*  | -93.3, 216.5  |  | 0.924 |
| IL-18 (pg/ml) | 12 | 12 | 436.7 | 159.4, 713.9 |  | 11 | 720.7  | 408.3, 1033.0 |  | 0.167 |
|               | 14 | 9  | 452.1 | 165.5, 738.7 |  | 13 | 85.2*  | -226.2, 396.5 |  | 0.084 |
|               | 23 | 11 | 281.1 | 6.4, 555.9   |  | 12 | 133.5* | -176.7, 443.8 |  | 0.456 |

Flt-3L, FMS-related tyrosine kinase 3 ligand; GM CSF, Granulocyte-macrophage colony-stimulating factor; IFN- $\gamma$ , Interferon gamma; IL-1 $\beta$ , Interleukin-1 beta; IL-2, Interleukin-2; PDGF-BB, Platelet-derived growth factor-BB; IL-12, Interleukin-12; IL-13, Interleukin-13; IL-4, Interleukin-4; IL-6, Interleukin-6; IL-8, Interleukin-8; KC, Keratinocyte chemoattractant; SDF 1, Stromal cell-derived factor 1; RANTES, Regulated on activation, normal T cell expressed and secreted; SCF, Stem cell factor; TNF\_a, Tumour Necrosis Factor alpha; IL-18, Interleukin-18

\* A significant difference from baseline within diet group ( $p < 0.05$ )

### Supplementary Table S7: Nucleotides

Blood nucleotides values given as means and 95% confidence intervals (CI) for control and test diet kitten group. P values represents comparison between diet group at the sample collection timepoint ( $p < 0.05$  is statistically significant).

| Parameter                  | Week | Control |        |               | Week | Test   |               |        | p     |
|----------------------------|------|---------|--------|---------------|------|--------|---------------|--------|-------|
|                            |      | n       | Mean   | 95% CI        |      | n      | Mean          | 95% CI |       |
| GMP (nmol/ml)              | 10   | 14      | 2.21   | 0.71, 3.71    | 11   | 2.18   | 0.54, 3.81    |        | 0.967 |
|                            | 18   | 16      | 2.72   | 1.27, 4.17    | 11   | 2.48   | 0.84, 4.11    |        | 0.772 |
|                            | 27   | 12      | 0.98*  | -0.55, 2.51   | 14   | 1.67   | 0.11, 3.24    |        | 0.408 |
| IMP (nmol/ml)              | 10   | 14      | 0.318  | 0.155, 0.482  | 11   | 0.239  | 0.055, 0.423  |        | 0.470 |
|                            | 18   | 16      | 0.244  | 0.091, 0.398  | 11   | 0.235  | 0.052, 0.419  |        | 0.933 |
|                            | 27   | 12      | 0.282  | 0.108, 0.456  | 14   | 0.301  | 0.133, 0.469  |        | 0.859 |
| AMP (nmol/ml)              | 10   | 14      | 10.40  | 6.32, 14.50   | 11   | 7.40   | 3.00, 11.80   |        | 0.149 |
|                            | 18   | 16      | 7.99   | 3.99, 12.00   | 11   | 7.14   | 2.74, 11.50   |        | 0.681 |
|                            | 27   | 12      | 8.58   | 4.42, 12.70   | 14   | 6.06   | 1.80, 10.30   |        | 0.225 |
| CDP (nmol/ml)              | 10   | 14      | 1.50   | 0.94, 2.06    | 11   | 1.43   | 0.83, 2.02    |        | 0.794 |
|                            | 18   | 16      | 1.28   | 0.74, 1.83    | 11   | 1.13   | 0.53, 1.72    |        | 0.556 |
|                            | 27   | 12      | 0.35*  | -0.21, 0.92   | 14   | 0.62*  | 0.03, 1.20    |        | 0.330 |
| UDP (nmol/ml)              | 10   | 14      | 1.08   | 0.74, 1.43    | 11   | 0.63   | 0.25, 1.02    |        | 0.049 |
|                            | 18   | 16      | 0.53*  | 0.20, 0.85    | 11   | 0.50   | 0.11, 0.89    |        | 0.901 |
|                            | 27   | 12      | 1.25   | 0.89, 1.61    | 14   | 0.83   | 0.47, 1.19    |        | 0.058 |
| GDP (nmol/ml)              | 10   | 14      | 4.01   | 3.26, 4.76    | 11   | 3.95   | 3.00, 4.90    |        | 0.895 |
|                            | 18   | 16      | 2.99*  | 2.26, 3.72    | 11   | 3.66   | 2.71, 4.61    |        | 0.163 |
|                            | 27   | 12      | 3.28*  | 2.52, 4.05    | 14   | 3.34   | 2.44, 4.24    |        | 0.903 |
| CTP (nmol/ml)              | 10   | 4       | 0.969  | 0.458, 1.480  | 4    | 0.995  | 0.458, 1.530  |        | 0.936 |
|                            | 18   | 5       | 0.783  | 0.328, 1.240  | 4    | 0.164* | -0.373, 0.701 |        | 0.079 |
|                            | 27   | 8       | 0.350* | -0.023, 0.723 | 7    | 0.266* | -0.184, 0.716 |        | 0.745 |
| ADP (nmol/ml)              | 10   | 14      | 36.7   | 30.0, 43.5    | 11   | 32.3   | 24.8, 39.8    |        | 0.298 |
|                            | 18   | 16      | 29.8*  | 23.4, 36.2    | 11   | 27.4   | 19.9, 34.9    |        | 0.556 |
|                            | 27   | 12      | 40.8   | 33.8, 47.8    | 14   | 35.0   | 28.0, 42.0    |        | 0.166 |
| UTP (nmol/ml)              | 10   | 14      | 7.63   | 4.98, 10.30   | 11   | 7.67   | 4.86, 10.50   |        | 0.970 |
|                            | 18   | 16      | 7.06   | 4.71, 9.41    | 11   | 5.00*  | 2.50, 7.50    |        | 0.040 |
|                            | 27   | 12      | 4.79*  | 2.49, 7.09    | 14   | 3.85*  | 1.49, 6.22    |        | 0.285 |
| GTP (nmol/ml)              | 10   | 14      | 8.66   | 6.93, 10.40   | 11   | 8.81   | 6.91, 10.70   |        | 0.886 |
|                            | 18   | 16      | 6.84*  | 5.29, 8.39    | 11   | 8.15   | 6.37, 9.93    |        | 0.176 |
|                            | 27   | 12      | 5.56*  | 4.03, 7.08    | 14   | 6.39*  | 4.83, 7.95    |        | 0.336 |
| ATP (nmol/ml)              | 10   | 14      | 149    | 128, 170      | 11   | 135    | 112, 159      |        | 0.292 |
|                            | 18   | 16      | 157    | 137, 178      | 11   | 148    | 125, 172      |        | 0.472 |
|                            | 27   | 12      | 155    | 133, 177      | 14   | 143    | 120, 165      |        | 0.328 |
| UMP,UDP and UTP (nmol/ml)  | 10   | 14      | 10.30  | 7.55, 13.00   | 11   | 8.51   | 5.62, 11.40   |        | 0.148 |
|                            | 18   | 16      | 8.65   | 6.14, 11.20   | 11   | 6.06*  | 3.40, 8.71    |        | 0.011 |
|                            | 27   | 12      | 7.32*  | 4.84, 9.80    | 14   | 5.37*  | 2.83, 7.91    |        | 0.034 |
| GMP, GDP and GTP (nmol/ml) | 10   | 14      | 14.8   | 12.3, 17.4    | 11   | 15.1   | 12.3, 17.9    |        | 0.874 |
|                            | 18   | 16      | 12.5   | 10.1, 14.9    | 11   | 14.4   | 11.6, 17.2    |        | 0.209 |
|                            | 27   | 12      | 9.8*   | 7.2, 12.4     | 14   | 11.5*  | 8.89, 14.2    |        | 0.252 |
| AMP, ADP and ATP (nmol/ml) | 10   | 14      | 148    | 127, 172      | 11   | 133    | 112, 157      |        | 0.239 |
|                            | 18   | 16      | 154    | 133, 178      | 11   | 145    | 123, 172      |        | 0.537 |
|                            | 27   | 12      | 154    | 132, 181      | 14   | 140    | 120, 164      |        | 0.291 |
|                            | 10   | 13      | 2.98   | 1.68, 4.28    | 8    | 0.79   | -0.59, 2.16   |        | 0.000 |

|                                |    |    |       |            |    |       |             |       |
|--------------------------------|----|----|-------|------------|----|-------|-------------|-------|
| C nucleosides<br>(nmol/ml)     | 18 | 12 | 3.20  | 1.90, 4.50 | 11 | 1.29  | -0.04, 2.62 | 0.002 |
|                                | 27 | 12 | 3.63  | 2.34, 4.91 | 14 | 1.29  | -0.01, 2.58 | 0.000 |
| U nucleosides<br>(nmol/ml)     | 10 | 13 | 37.7  | 22.6, 52.8 | 8  | 17.4  | 0.7, 34.1   | 0.003 |
|                                | 18 | 12 | 33.3  | 18.1, 48.4 | 11 | 19.6  | 3.4, 35.8   | 0.039 |
|                                | 27 | 12 | 36.0  | 21.0, 51.1 | 14 | 19.3  | 3.5, 35.1   | 0.011 |
| G nucleosides<br>(nmol/ml)     | 10 | 13 | 17.3  | 14.2, 20.5 | 8  | 16.7  | 13.1, 20.3  | 0.749 |
|                                | 18 | 12 | 16.5  | 13.4, 19.7 | 11 | 14.8  | 11.5, 18.1  | 0.342 |
|                                | 27 | 12 | 13.9* | 10.7, 17.0 | 14 | 12.3* | 9.2, 15.4   | 0.376 |
| A nucleosides<br>(nmol/ml)     | 10 | 13 | 184   | 162, 206   | 8  | 171   | 146, 196    | 0.346 |
|                                | 18 | 12 | 194   | 172, 217   | 11 | 170   | 146, 193    | 0.064 |
|                                | 27 | 12 | 186   | 163, 208   | 14 | 170   | 148, 192    | 0.230 |
| Total nucleosides<br>(nmol/ml) | 10 | 13 | 242   | 207, 277   | 8  | 207   | 169, 246    | 0.076 |
|                                | 18 | 12 | 248   | 213, 283   | 11 | 207   | 171, 244    | 0.036 |
|                                | 27 | 12 | 239   | 204, 273   | 14 | 205   | 170, 240    | 0.074 |

GMP, Guanosine monophosphate; IMP, Inosine monophosphate; AMP, Adenosine monophosphate; CDP, Cytidine diphosphate; UDP, Uridine diphosphate; GDP, Guanosine diphosphate; CTP, Cytidine triphosphate; ADP, Adenosine diphosphate; UTP, Uridine triphosphate; GTP, Guanosine triphosphate; ATP, Adenosine triphosphate; UMP, Uridine monophosphate; C Nucleosides, Cytidine nucleosides; U Nucleosides, Uridine nucleosides; G Nucleosides, Guanosine nucleosides; A Nucleosides, Adenosine nucleosides

\* A significant difference from week 10 within diet group ( $p < 0.05$ )
